# Supplementary material for: Nuclear β-arrestin1 is a critical cofactor of hypoxia-inducible factor-1α signaling in endothelin-1-induced ovarian tumor progression
Source: PubMed Central journal article supplement (PMC4951250; doi:10.18632/oncotarget.7461), 2016-02-17
Supplement: oncotarget-07-17790-s001.pdf [file oncotarget-07-17790-s001.pdf]

## Nuclear $\beta$ -arrestin1 is a critical cofactor of hypoxia-inducible factor-1 $\alpha$ signaling in endothelin-1-induced ovarian tumor progression

### Supplementary Material

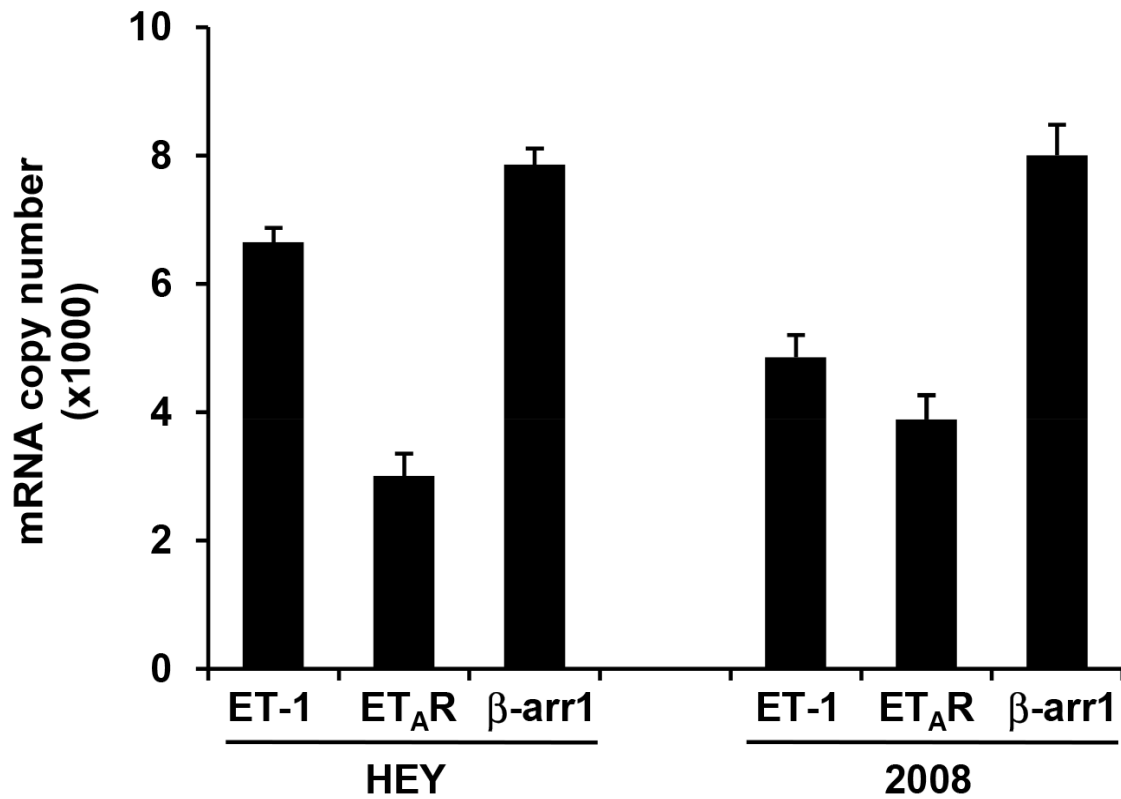

**Supplementary Figure 1. ET-1, ET<sub>A</sub>R, and  $\beta$ -arr1 expression in EOC cells.** qRT-PCR analysis of ET-1, ET<sub>A</sub>R, and  $\beta$ -arr1 expression in HEY and 2008 cells. Bars are means  $\pm$ SD from three independent experiments each performed in triplicate.

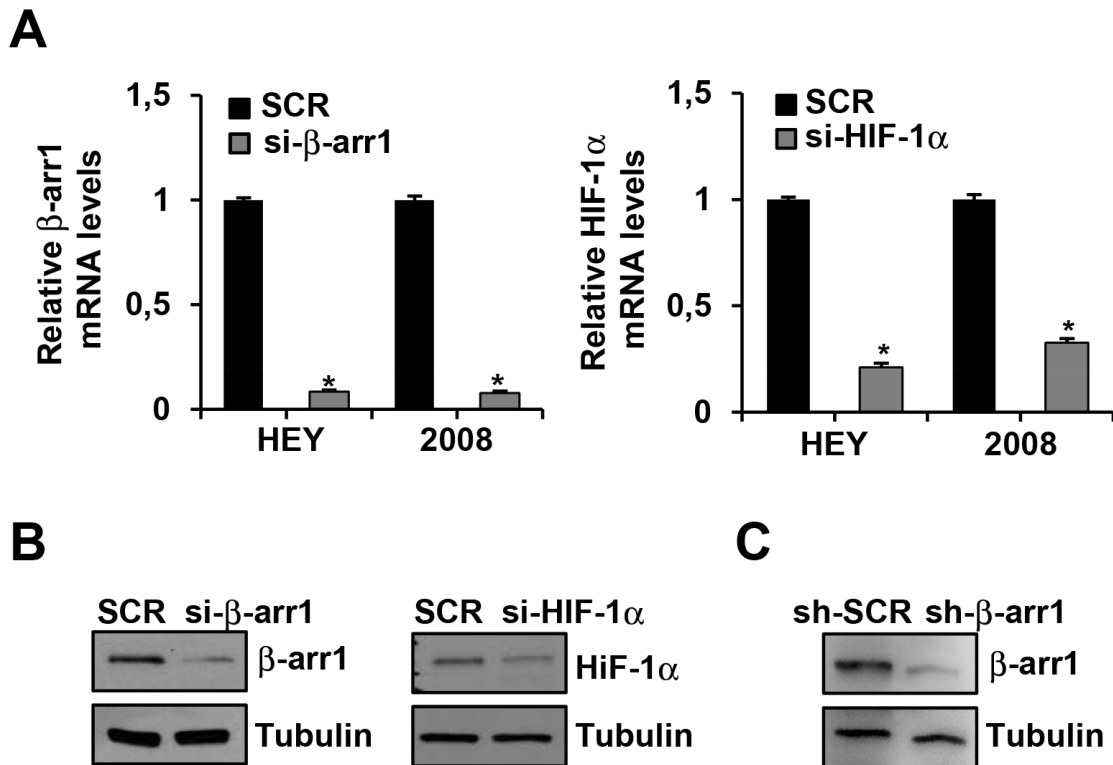

**Supplementary Figure 2. Analysis of  $\beta$ -arr1 and HIF-1 $\alpha$  knockdown. (A)** qRT-PCR analysis of  $\beta$ -arr1 and HIF-1 $\alpha$  expression levels in HEY and 2008 cells transfected with SCR or si- $\beta$ -arr1 or si-HIF-1 $\alpha$ . Bars are means  $\pm$ SD from three independent experiments each performed in triplicate; \*,  $p < 0,001$  versus SCR. **(B)** Lysates of HEY cells transfected with SCR or si- $\beta$ -arr1 or si-HIF1 $\alpha$  were analyzed by IB for expression of  $\beta$ -arr1 or HIF-1 $\alpha$ . Tubulin was used as loading control. **(C)** Lysates of HEY cells stably expressing sh-SCR, sh- $\beta$ -arr1 were IB for  $\beta$ -arr1 protein expression levels by using anti- $\beta$ -arr1. Tubulin was used as loading control.

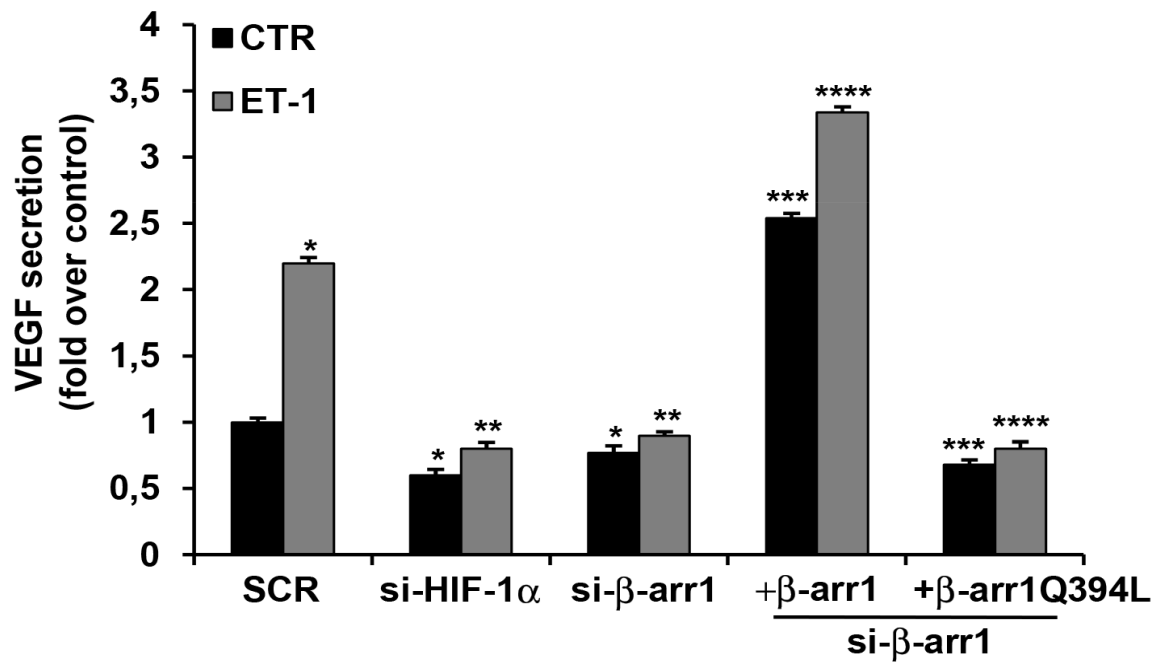

**Supplementary Figure 3. The secretion of VEGF by EOC cells requires  $\beta$ -arr1 and HIF-1 $\alpha$ .** (A) VEGF protein secretion evaluated by ELISA in conditioned media of HEY cells transfected with SCR or si-HIF1 $\alpha$  or si- $\beta$ -arr1 and rescued with  $\beta$ -arr1 or  $\beta$ -arr1Q394L expression vectors and treated or not with ET-1 for 24 h. Bars are means  $\pm$ SD from three independent experiments each performed in triplicate; \*,  $p < 0.05$  versus CTR; \*\*,  $p < 0.05$  versus ET-1; \*\*\*,  $p < 0.002$  versus si- $\beta$ -arr1; \*\*\*\*,  $p < 0.005$  versus si- $\beta$ -arr1 and ET-1.

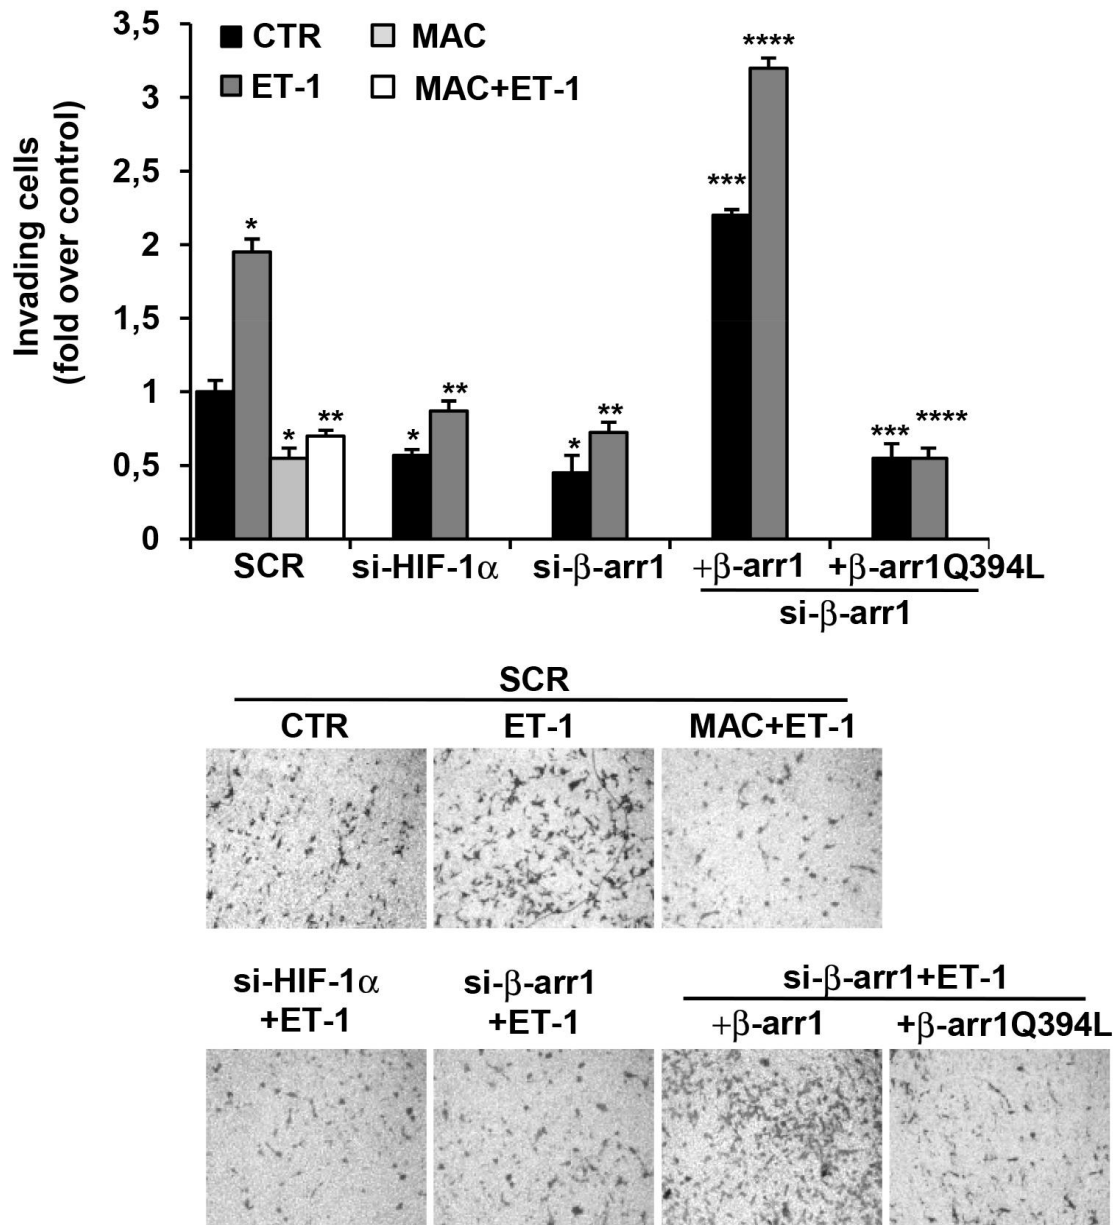

**Supplementary Figure 4. ET<sub>A</sub>R/ $\beta$ -arr1 driven HIF-1 $\alpha$  signaling sustains cell invasion.**

Cell invasion assay was performed in HEY cells, transfected with SCR, or si-HIF-1 $\alpha$ , or si- $\beta$ -arr1 or si- $\beta$ -arr1 rescued with  $\beta$ -arr1 or  $\beta$ -arr1Q394L expression vectors. ET-1 in the absence or presence of MAC was used as chemoattractant. Bars are means  $\pm$ SD from three independent experiments each performed in triplicate; \*, p<0.05 versus SCR-CTR; \*\*, p<0.001 versus SCR-ET-1; \*\*\*, p<0.002 versus si- $\beta$ -arr1; \*\*\*\*, p<0.005 versus si- $\beta$ -arr1 and ET-1. Representative images of invading cells (*bottom panels*).
